# Supplementary material
Source: publisher figshare collection journal article supplement (https://acs.figshare.com/ndownloader/files/3969832)
Supplement: Supplementary file 1 [file 3969832]

# Supporting Information

## An Inorganic Hole Conductor for Organo-Lead Halide Perovskite Solar Cells. Improved Hole Conductivity with Copper Iodide.

Jeffrey A. Christians<sup>1</sup>, Raymond C. M. Fung<sup>3</sup> and Prashant V. Kamat<sup>\*1,2</sup>

University of Notre Dame  
Notre Dame, Indiana 46556

---

\*Corresponding author: pkamat@nd.edu

<sup>1</sup>Radiation Laboratory, Department of Chemical and Biomolecular Engineering

<sup>2</sup>Department of Chemistry and Biochemistry

<sup>3</sup>Coop Student, University of Waterloo, Canada

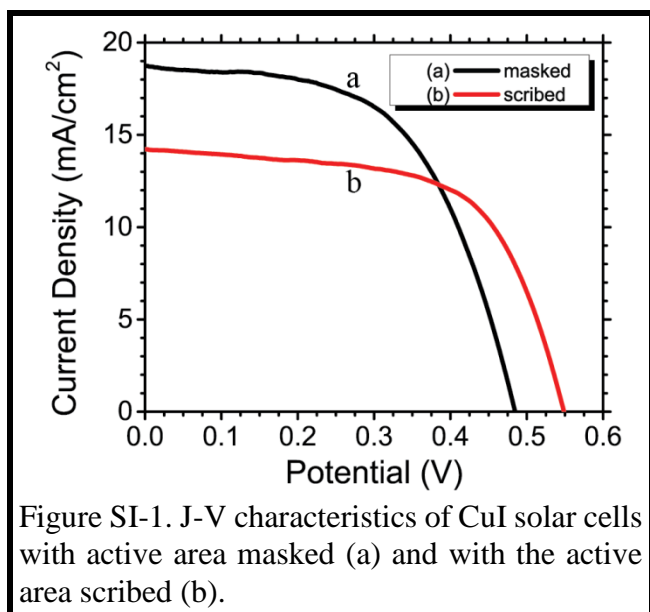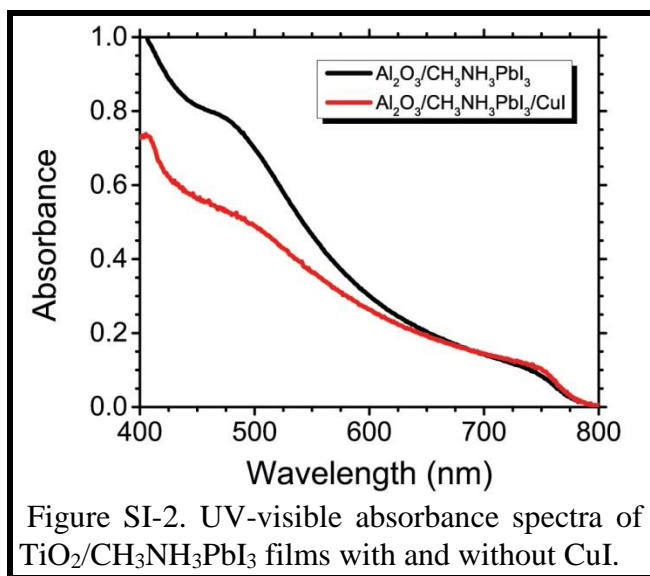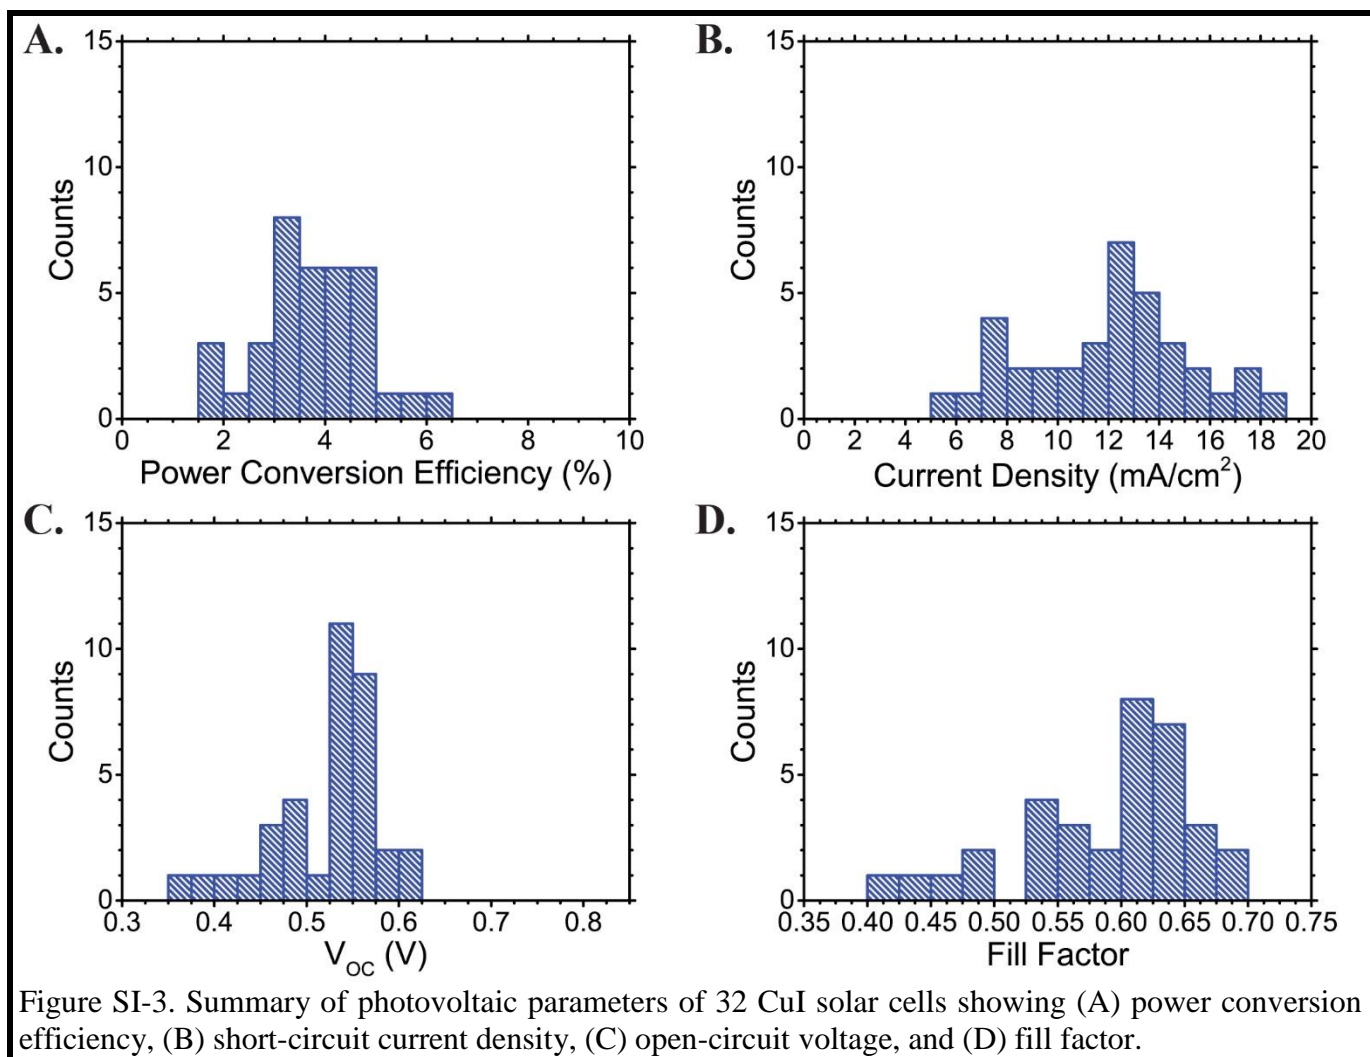

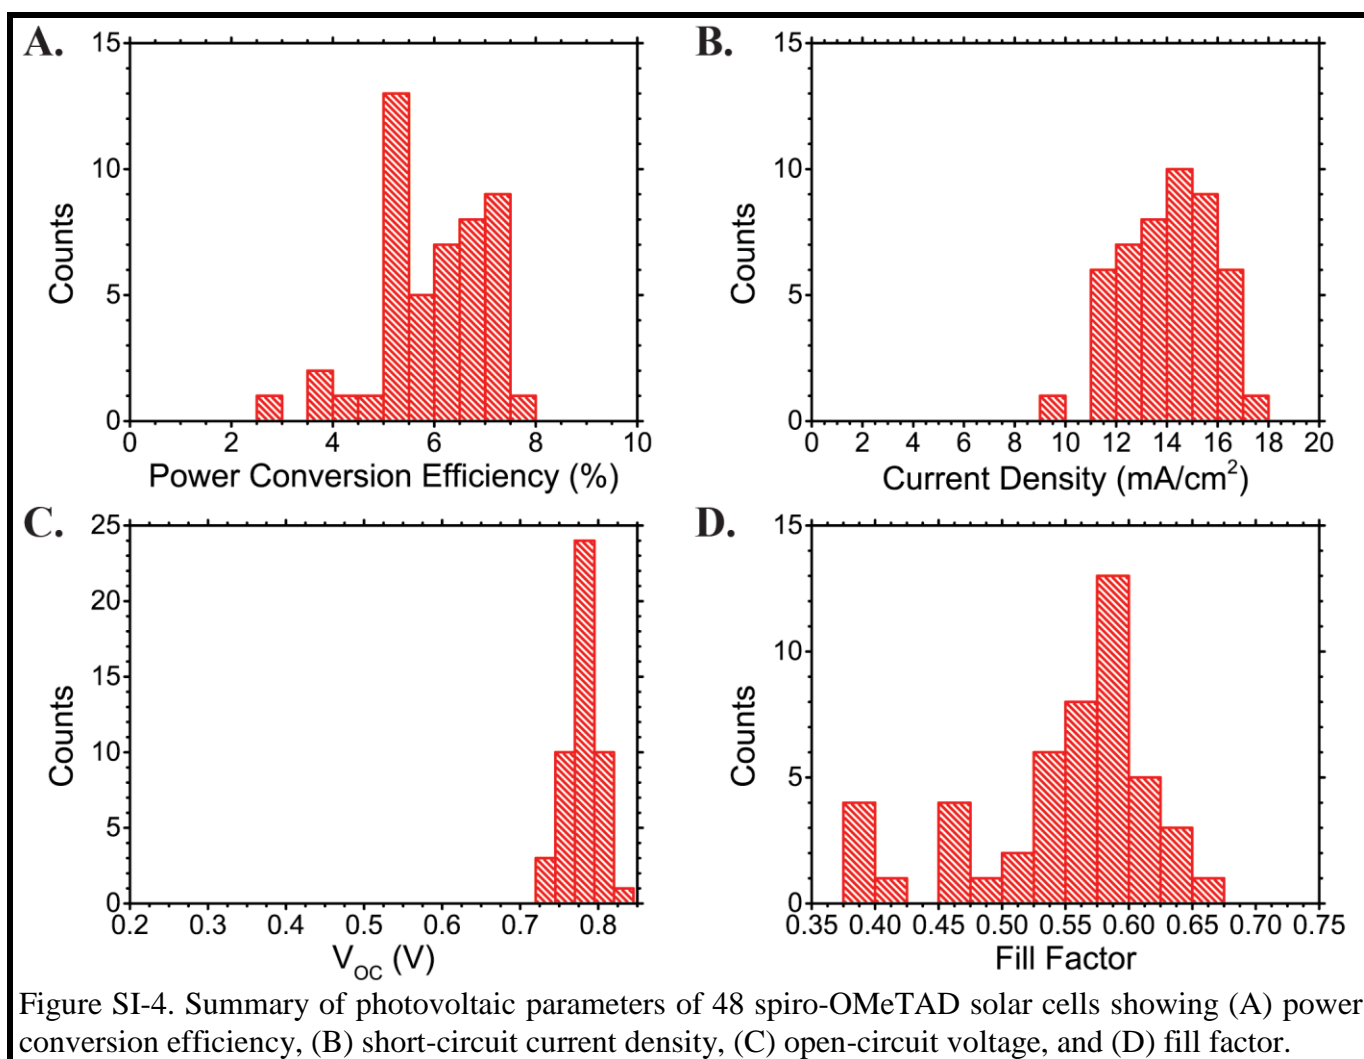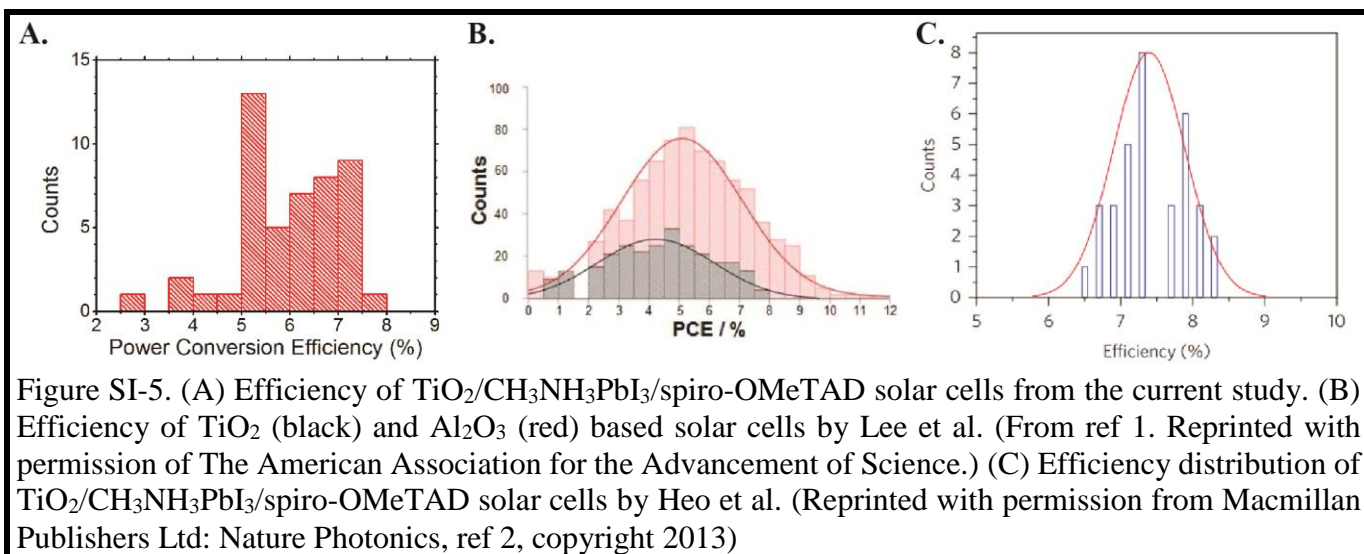

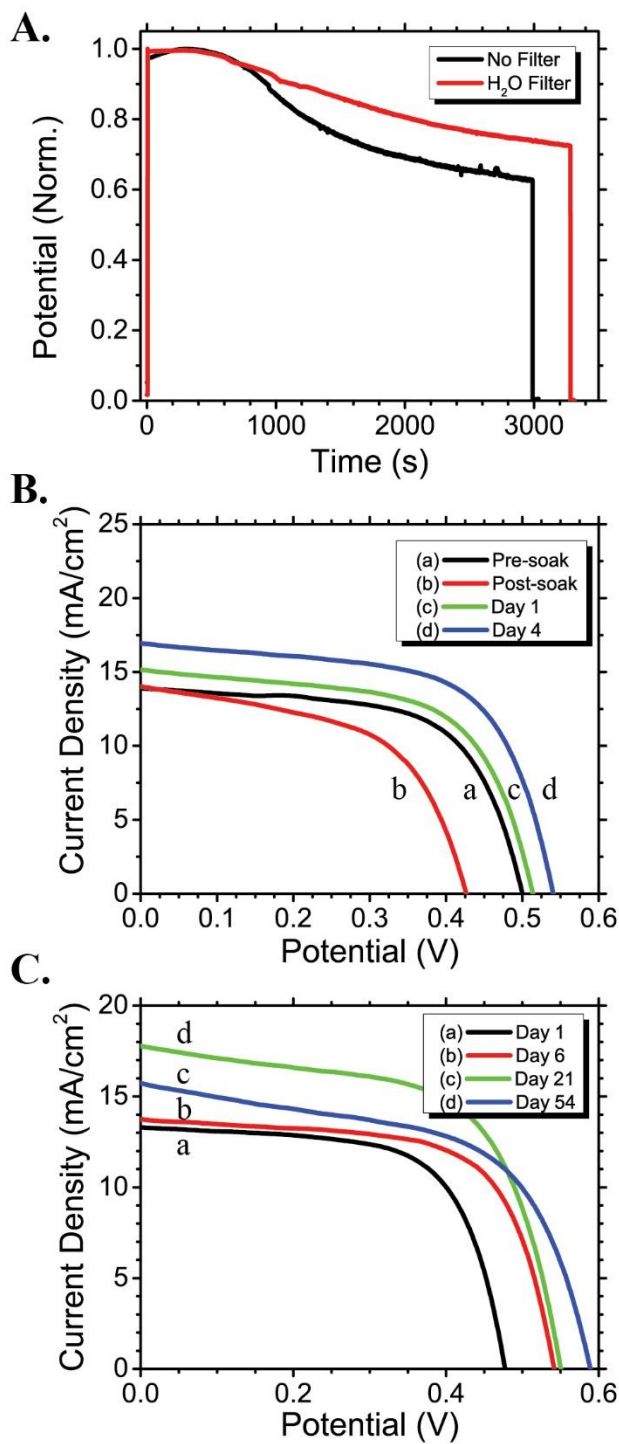

Figure SI-6. (A) Normalized open-circuit voltage of CuI solar cell upon continuous 100 mW/cm<sup>2</sup> illumination with and without a water filter. (B) J-V curve (a) before illumination, (b) immediately following 1 h continuous illumination at  $V_{oc}$ , and after (c) 1 and (d) 4 days storage in the dark. (C) J-V curve evolution upon storage in ambient conditions with no encapsulation over a period of 54 days.
